# Supplementary material for: Single-cell whole genome sequencing reveals no evidence for common aneuploidy in normal and Alzheimer’s disease neurons
Source: PubMed Central journal article supplement (PMC4888403; doi:10.1186/s13059-016-0976-2), 2016-05-31

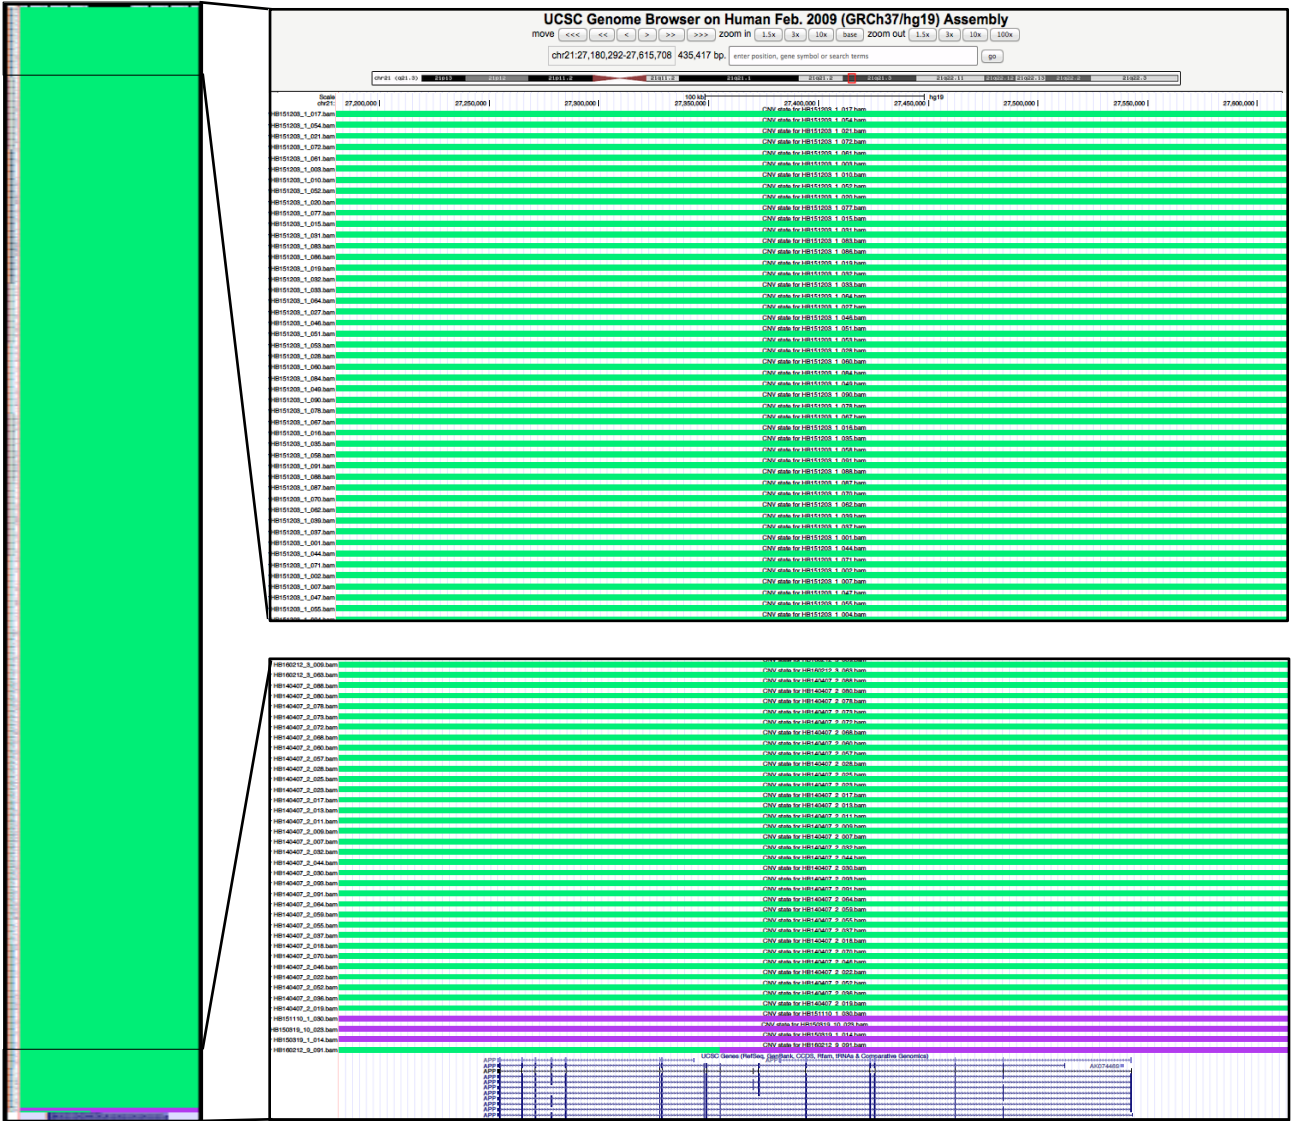

Supplement: 13059_2016_976_MOESM7_ESM.pdf [file 13059_2016_976_MOESM7_ESM.pdf]
